# Supplementary material for: Prevalence, Predictors, and Outcomes of Type 2 NSTEMI in Hospitalized Patients With COVID‐19
Source: PubMed Central journal article supplement — J Am Heart Assoc. 2024 May 10;13(10):e032572. doi: 10.1161/JAHA.123.032572 (PMC11179823; doi:10.1161/jaha.123.032572), 2024-05-10
Supplement: JAH3-13-e032572-s001.pdf [file JAH3-13-e032572-s001.pdf]

# **SUPPLEMENTAL MATERIAL**

**Table S1. Morbidity & Mortality Outcomes in COVID-19 and Type 2 NSTEMI**

|                                         | Controls<br>(n = 2173) | Type 2 NSTEMI<br>(n = 579) | Hazard Ratio<br>(95% CI) | <i>p</i> value |
|-----------------------------------------|------------------------|----------------------------|--------------------------|----------------|
| Mortality (death or hospice)            | 795 (37%)              | 216 (37%)                  | 1.40 (1.13 – 1.74)       | 0.002          |
| Adverse cardiac event                   | 276 (13%)              | 199 (34%)                  | 3.86 (3.08 – 4.83)       | <.001          |
| Adverse vascular event                  | 260 (12%)              | 72 (12%)                   | 2.31 (1.70 – 3.15)       | <.001          |
| Intubation                              | 764 (35%)              | 198 (34%)                  | 2.98 (2.39 – 3.72)       | <.001          |
| Length of stay (days)<br>Median (Q1-Q3) | 6.4 (3.6-11.8)         | 9.4 (4.9-17.4)             | 1.03 (1.02 – 1.04)       | <.001          |
| Major bleeding                          | 76 (4%)                | 50 (9%)                    | 2.63 (1.82 – 3.81)       | <.001          |
| New HD or CRRT                          | 73 (3%)                | 46 (8%)                    | 2.70 (1.81 – 4.03)       | <.001          |
| Time in ICU (days)                      | 10 (13)                | 13 (14)                    | 1.04 (1.02 – 1.07)       | 0.002          |
| Transfer to ICU                         | 1282 (59%)             | 336 (58%)                  | 2.88 (2.37 – 3.51)       | <.001          |

Data displayed as: n (column precents), mean (SD), or median (IQR)  
Summary of Cox univariate regression analysis  
ICU: intensive care unit; HD: hemodialysis; CRRT: continuous renal replacement therapy

**Table S2. Pre-Admission Factors Associated with Type 2 NSTEMI**

|                                                                              | Odds Ratio (95% CI) | <i>p</i> value |
|------------------------------------------------------------------------------|---------------------|----------------|
| Admission heart rate (per 10 beats)                                          | 1.16 (1.10 – 1.22)  | <0.001         |
| Medicaid insurance (vs. private)                                             | 2.23 (1.47 – 3.39)  | <0.001         |
| Hypertension                                                                 | 1.41 (1.08 – 1.84)  | 0.012          |
| Coronary Artery Disease                                                      | 1.87 (1.43 – 2.44)  | <0.001         |
| Heart failure                                                                | 1.84 (1.43 – 2.37)  | <0.001         |
| Chronic Kidney Disease                                                       | 1.84 (1.43 – 2.36)  | <0.001         |
| PTA Anticoagulation Medications                                              | 0.72 (0.54 – 0.95)  | 0.022          |
| PTA Antihyperglycemic Medications                                            | 0.76 (0.60 – 0.95)  | 0.018          |
| Summary of conditional logistic regression analysis to predict type 2 NSTEMI |                     |                |
| PTA: prior to admission                                                      |                     |                |

**Table S3. Pre-Admission Factors Associated with Mortality in COVID-19**

|                                                                                                                      | Hazard Ratio (95% CI) | <i>p</i> value |
|----------------------------------------------------------------------------------------------------------------------|-----------------------|----------------|
| Type 2 NSTEMI                                                                                                        | 1.28 (1.004 – 1.62)   | 0.046          |
| Admission systolic blood pressure (per 10 mm Hg)                                                                     | 0.90 (0.86 – 0.95)    | <0.001         |
| Admission heart rate (per 10 beats)                                                                                  | 1.16 (1.09 – 1.23)    | <0.001         |
| Payment source (vs. private)                                                                                         |                       | 0.005          |
| Medicaid                                                                                                             | 2.62 (1.29 – 5.31)    |                |
| Medicare                                                                                                             | 1.74 (1.03 – 2.96)    |                |
| More than one                                                                                                        | 2.10 (1.22 – 3.63)    |                |
| Other/Unknown                                                                                                        | 2.80 (1.36 – 5.77)    |                |
| Summary of stratified proportional hazards regression analysis to predict mortality (death and discharge to hospice) |                       |                |
